# Supplementary material for: Developmental transcriptome profiling of bovine muscle tissue reveals an abundant GosB that regulates myoblast proliferation and apoptosis
Source: PubMed Central journal article supplement (PMC5458270; doi:10.18632/oncotarget.16644), 2017-03-29
Supplement: oncotarget-08-32083-s001.pdf [file oncotarget-08-32083-s001.pdf]

# Developmental transcriptome profiling of bovine muscle tissue reveals an abundant GosB that regulates myoblast proliferation and apoptosis

## SUPPLEMENTARY FIGURES AND TABLES

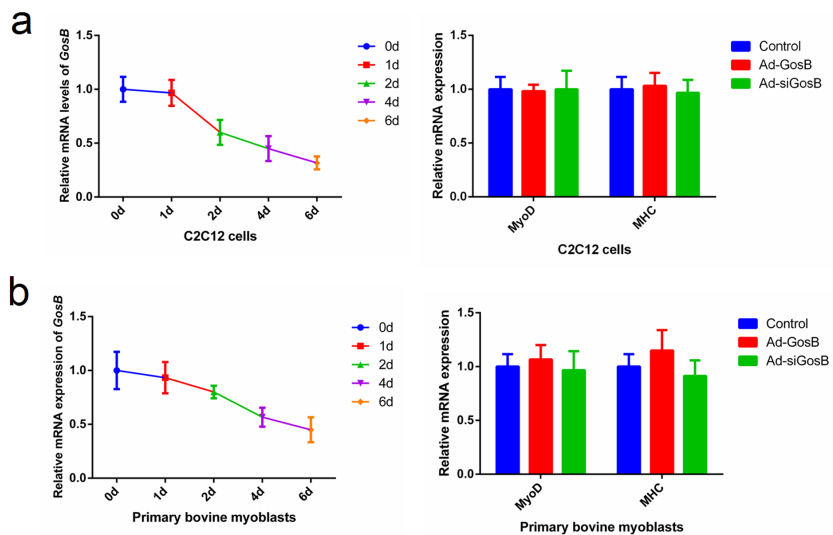

Supplementary Figure 1: GosB in myoblasts differentiation.

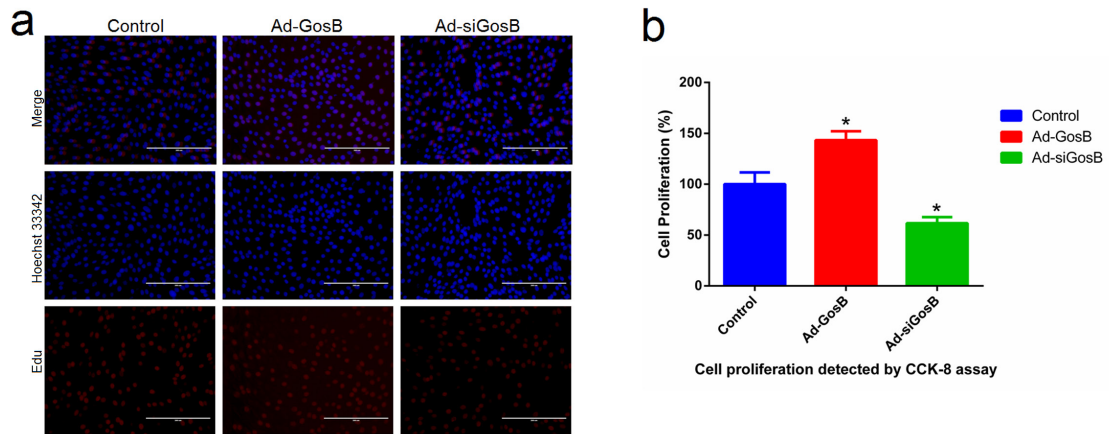

Supplementary Figure 2: Effects of GosB on primary bovine myoblasts proliferation.

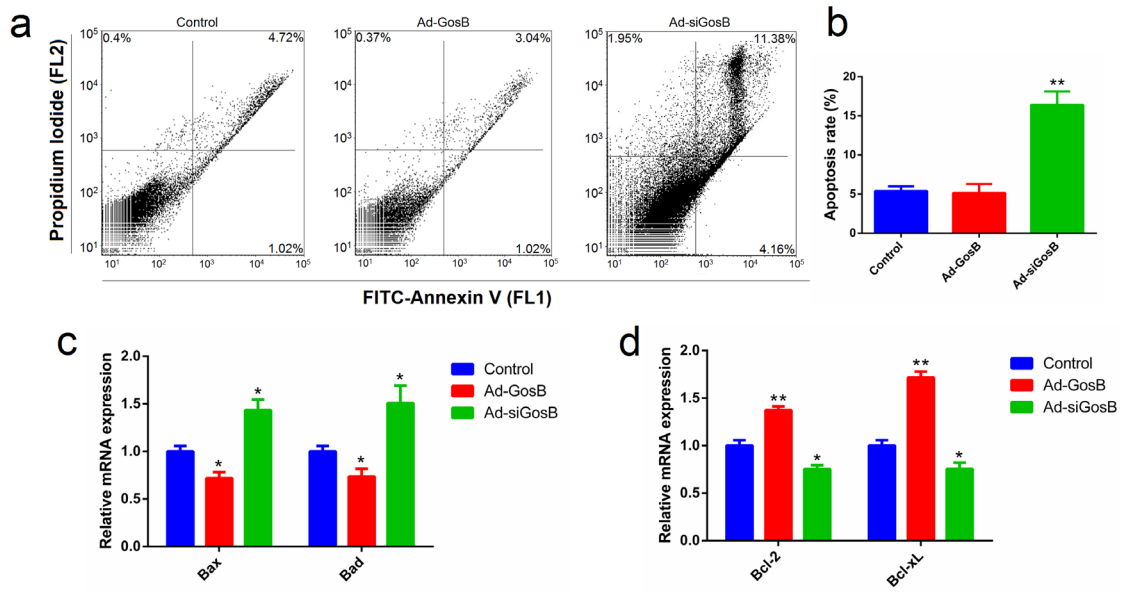

Supplementary Figure 3: Effects of GosB on cell apoptosis in primary bovine myoblasts.

Supplementary Table 1: Primers designed for quantitative real time PCR (qPCR)

| Gene                      | Primer sequence <sup>1</sup> (5'-3') | Product length (bp) | Efficiency <sup>2</sup> |
|---------------------------|--------------------------------------|---------------------|-------------------------|
| <i>GosB</i>               | F: ACCCACCCTCATCTCTTCCAT             | 130                 | 2.14                    |
|                           | R: GCCACTGCTGTAGCCACTCA              |                     |                         |
| <i>GAPDH</i> <sup>3</sup> | F: GCAAGTTCCACGGCACAG                | 249                 | 2.16                    |
|                           | R: GGTTCACACCAATCACAA                |                     |                         |
| <i>GAPDH</i> <sup>4</sup> | F: AGGACACTTGTCATCTCATTTC            | 169                 | 2.18                    |
|                           | R: TTGGAGTCAGGTTCTCTCTTGTA           |                     |                         |
| <i>MYOG</i>               | F: CAAATCCACTCCCTGAAA                | 93                  | 2.13                    |
|                           | R: GCATAGGAAGAGATGAACA               |                     |                         |
| <i>MYOD</i> <sup>3</sup>  | F: GGAAGGGAAGAGCAGAAG                | 82                  | 1.98                    |
|                           | R: AAGGACTACAACAACAACAAC             |                     |                         |
| <i>MYOD</i> <sup>4</sup>  | F: CCGCTCCGCGACGTAGACTTGA            | 92                  | 2.03                    |
|                           | R: GAGTCGAAACACGGGTCATCATA           |                     |                         |
| <i>MHC</i> <sup>3</sup>   | F: CAATAAACTGCGGGCAAAGAC             | 75                  | 2.01                    |
|                           | R: CTTGCTCACTCCTCGCTTTCA             |                     |                         |
| <i>MHC</i> <sup>4</sup>   | F: TGCTCATCTCACCAAGTTCC              | 150                 | 1.99                    |
|                           | R: CACTCTTCACTCTCATGGACC             |                     |                         |
| <i>IGFBP3</i>             | F: GCGCCCTTACCTGCTACCGT              | 175                 | 2.16                    |
|                           | R: GCTGTCCTTGGCATGACCTTTCT           |                     |                         |
| <i>P53</i>                | F: TGAACCGCCGACCTATCC                | 95                  | 2.1                     |
|                           | R: GCAGGCACAAACACGAACC               |                     |                         |
| <i>Bcl-xL</i>             | F: TCGGGATGGAGTAAACTGGG              | 65                  | 2.2                     |
|                           | R: CCACGCACAGTGCCCC                  |                     |                         |
| <i>Bad</i>                | F: GCAGCCACCAACAGTCATCAT             | 202                 | 1.87                    |
|                           | R: CAAACTCATCGCTCATCCTTCG            |                     |                         |
| <i>cyclinD1</i>           | F: TCTACACTGACAACTCTATCCG            | 304                 | 1.76                    |
|                           | R: TAGCAGGAGAGGAAGTTGTTGG            |                     |                         |
| <i>Caspase-3</i>          | F: TGTCATCTCGCTCTGGTACG              | 201                 | 2.02                    |
|                           | R: AAATGACCCCTTCATCACCA              |                     |                         |
| <i>Bcl-2</i>              | F: GGTGGTGGAGGAACTCTTCA              | 160                 | 2.23                    |
|                           | R: CAGATGCCGTTTCAGGTACT              |                     |                         |
| <i>Bax</i>                | F: GAAGCTGAGCGAGTGTCTCC              | 229                 | 1.98                    |
|                           | R: GATCAGCTCGGGCACTTTAG              |                     |                         |

<sup>1</sup>F = forward primer; R = reverse primer.

<sup>2</sup>The PCR efficiency was determined by  $[10^{(-1/\text{slope})}]$ ; the slope was obtained by the 7-point standard curve (with a minimum  $R^2$  of 0.99).

<sup>3</sup> Primers for real-time PCR of mouse.

<sup>4</sup> Primers for real-time PCR of cattle.

**Supplementary Table 2: List of differentially expressed genes identified in bovine skeletal muscle at two developmental stages**

See Supplementary File 1

**Supplementary Table 3: 157 terms that were found to be significantly enriched in the category ‘molecular function’ according to Gene Ontology analysis**

See Supplementary File 2

**Supplementary Table 4: 153 terms that were significantly enriched in the category ‘cellular component’ according to Gene Ontology analysis**

See Supplementary File 3

**Supplementary Table 5: 287 terms that were significantly enriched in the category ‘biological processes’ according to Gene Ontology analysis**

See Supplementary File 4

**Supplementary Table 6: 46 genes related to muscle cell proliferation and differentiation that were significantly differentially expressed in two developmental stages of bovine muscle tissue**

See Supplementary File 5
